# Supplementary material
Source: Springer Nature journal article supplement (https://www.springermedizin.de/resource/supplementary/13075_2013_4427_MOESM3_ESM.pdf/10110384)

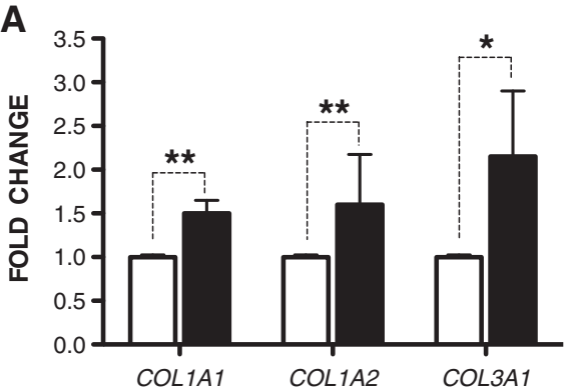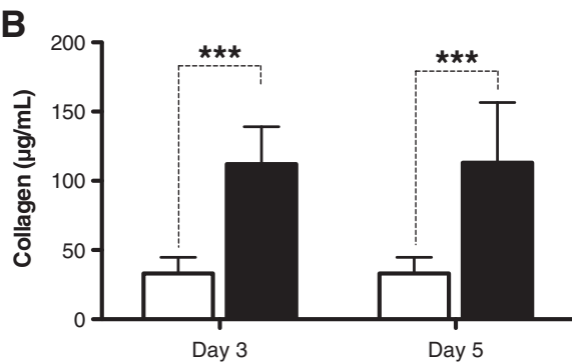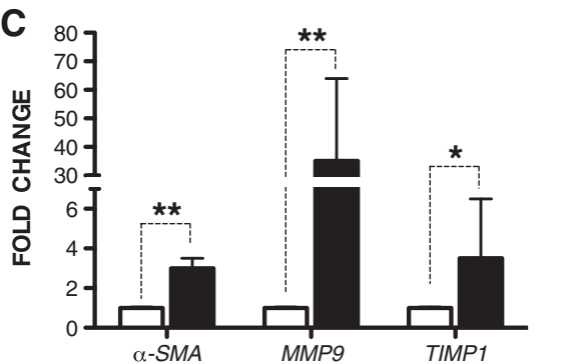

□ SScHDF  
■ SScHDF + B cells

Supplement: MOESM3 [file 10110384]
